# Supplementary material for: A Protoberberine Derivative HWY336 Selectively Inhibits MKK4 and MKK7 in Mammalian Cells: The Importance of Activation Loop on Selectivity
Source: PubMed Central journal article supplement (PMC3997336; doi:10.1371/journal.pone.0091037), 2014-04-23

**Figure S1**

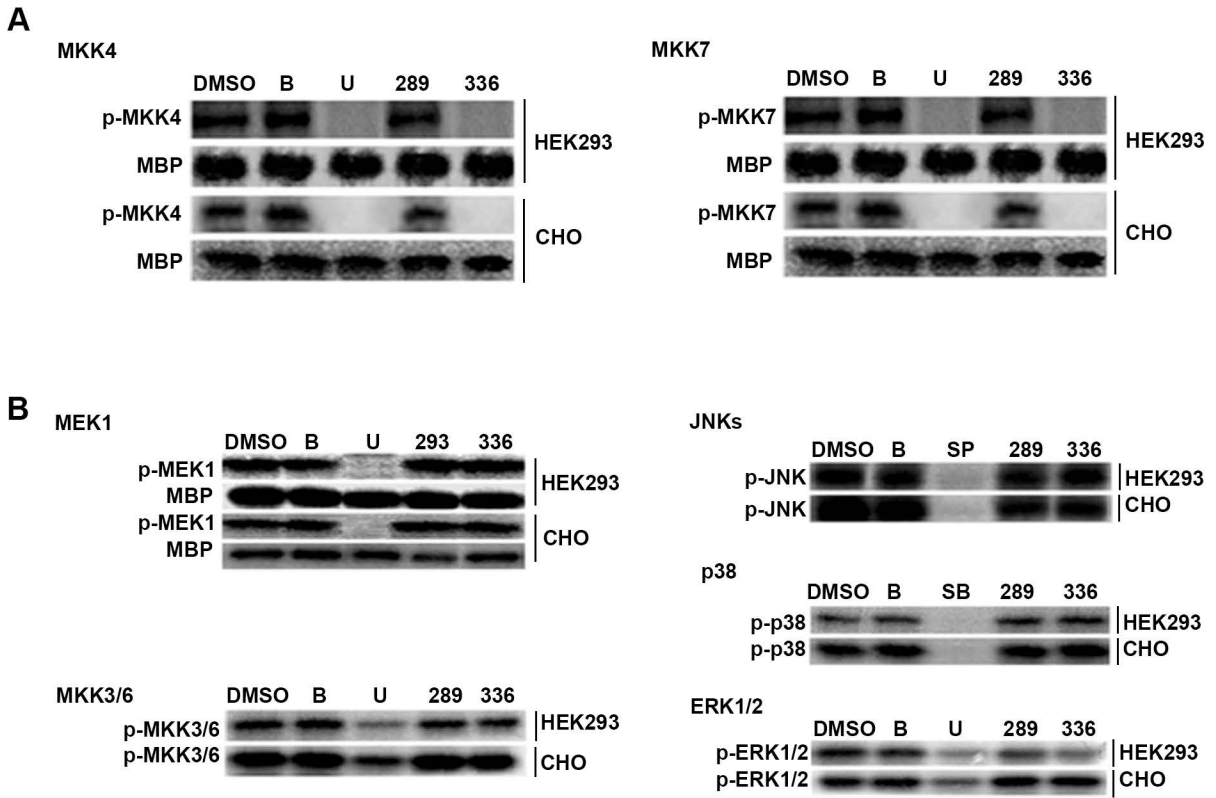

Figure S2

A

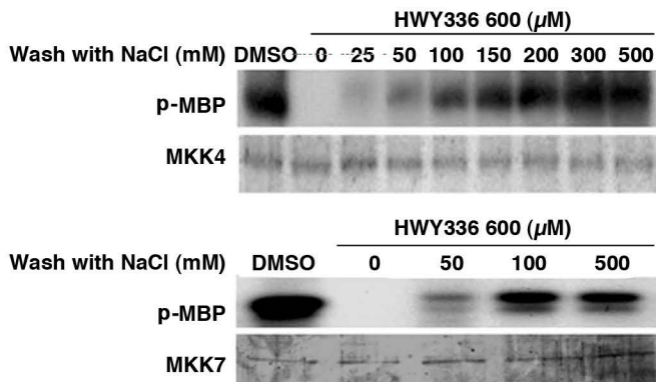

B

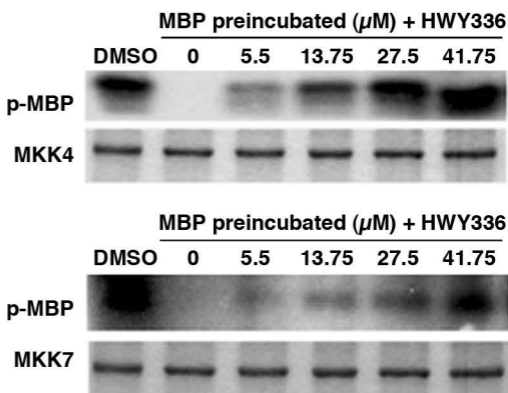

C

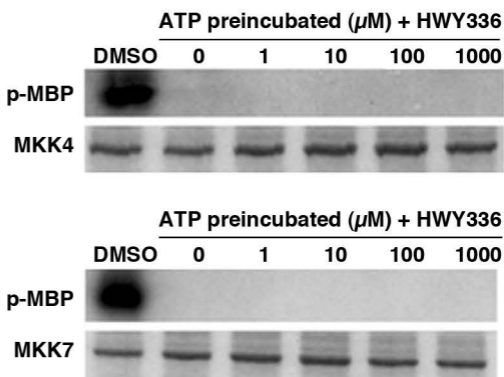

**Figure S3**

**A**

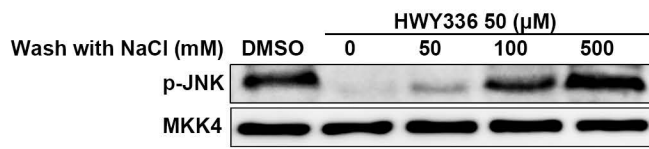

**B**

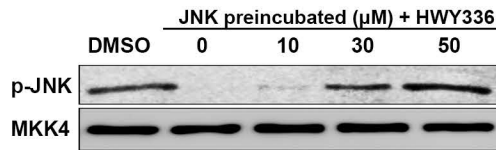

**C**

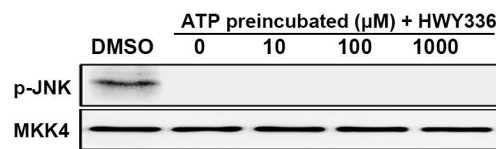



**Figure S5**

Site 9, 10 Å<sup>3</sup>

Site 7, 10 Å<sup>3</sup>

Site 3, 35 Å<sup>3</sup>

Site 1, 47 Å<sup>3</sup>

ATP binding pocket

Site 10, 10 Å<sup>3</sup>

Site 4, 20 Å<sup>3</sup>

Site 6, 11 Å<sup>3</sup>

Site 2, 46 Å<sup>3</sup>

Site 5, 14 Å<sup>3</sup>

HWY336 binding pocket

Site 8, 10 Å<sup>3</sup>

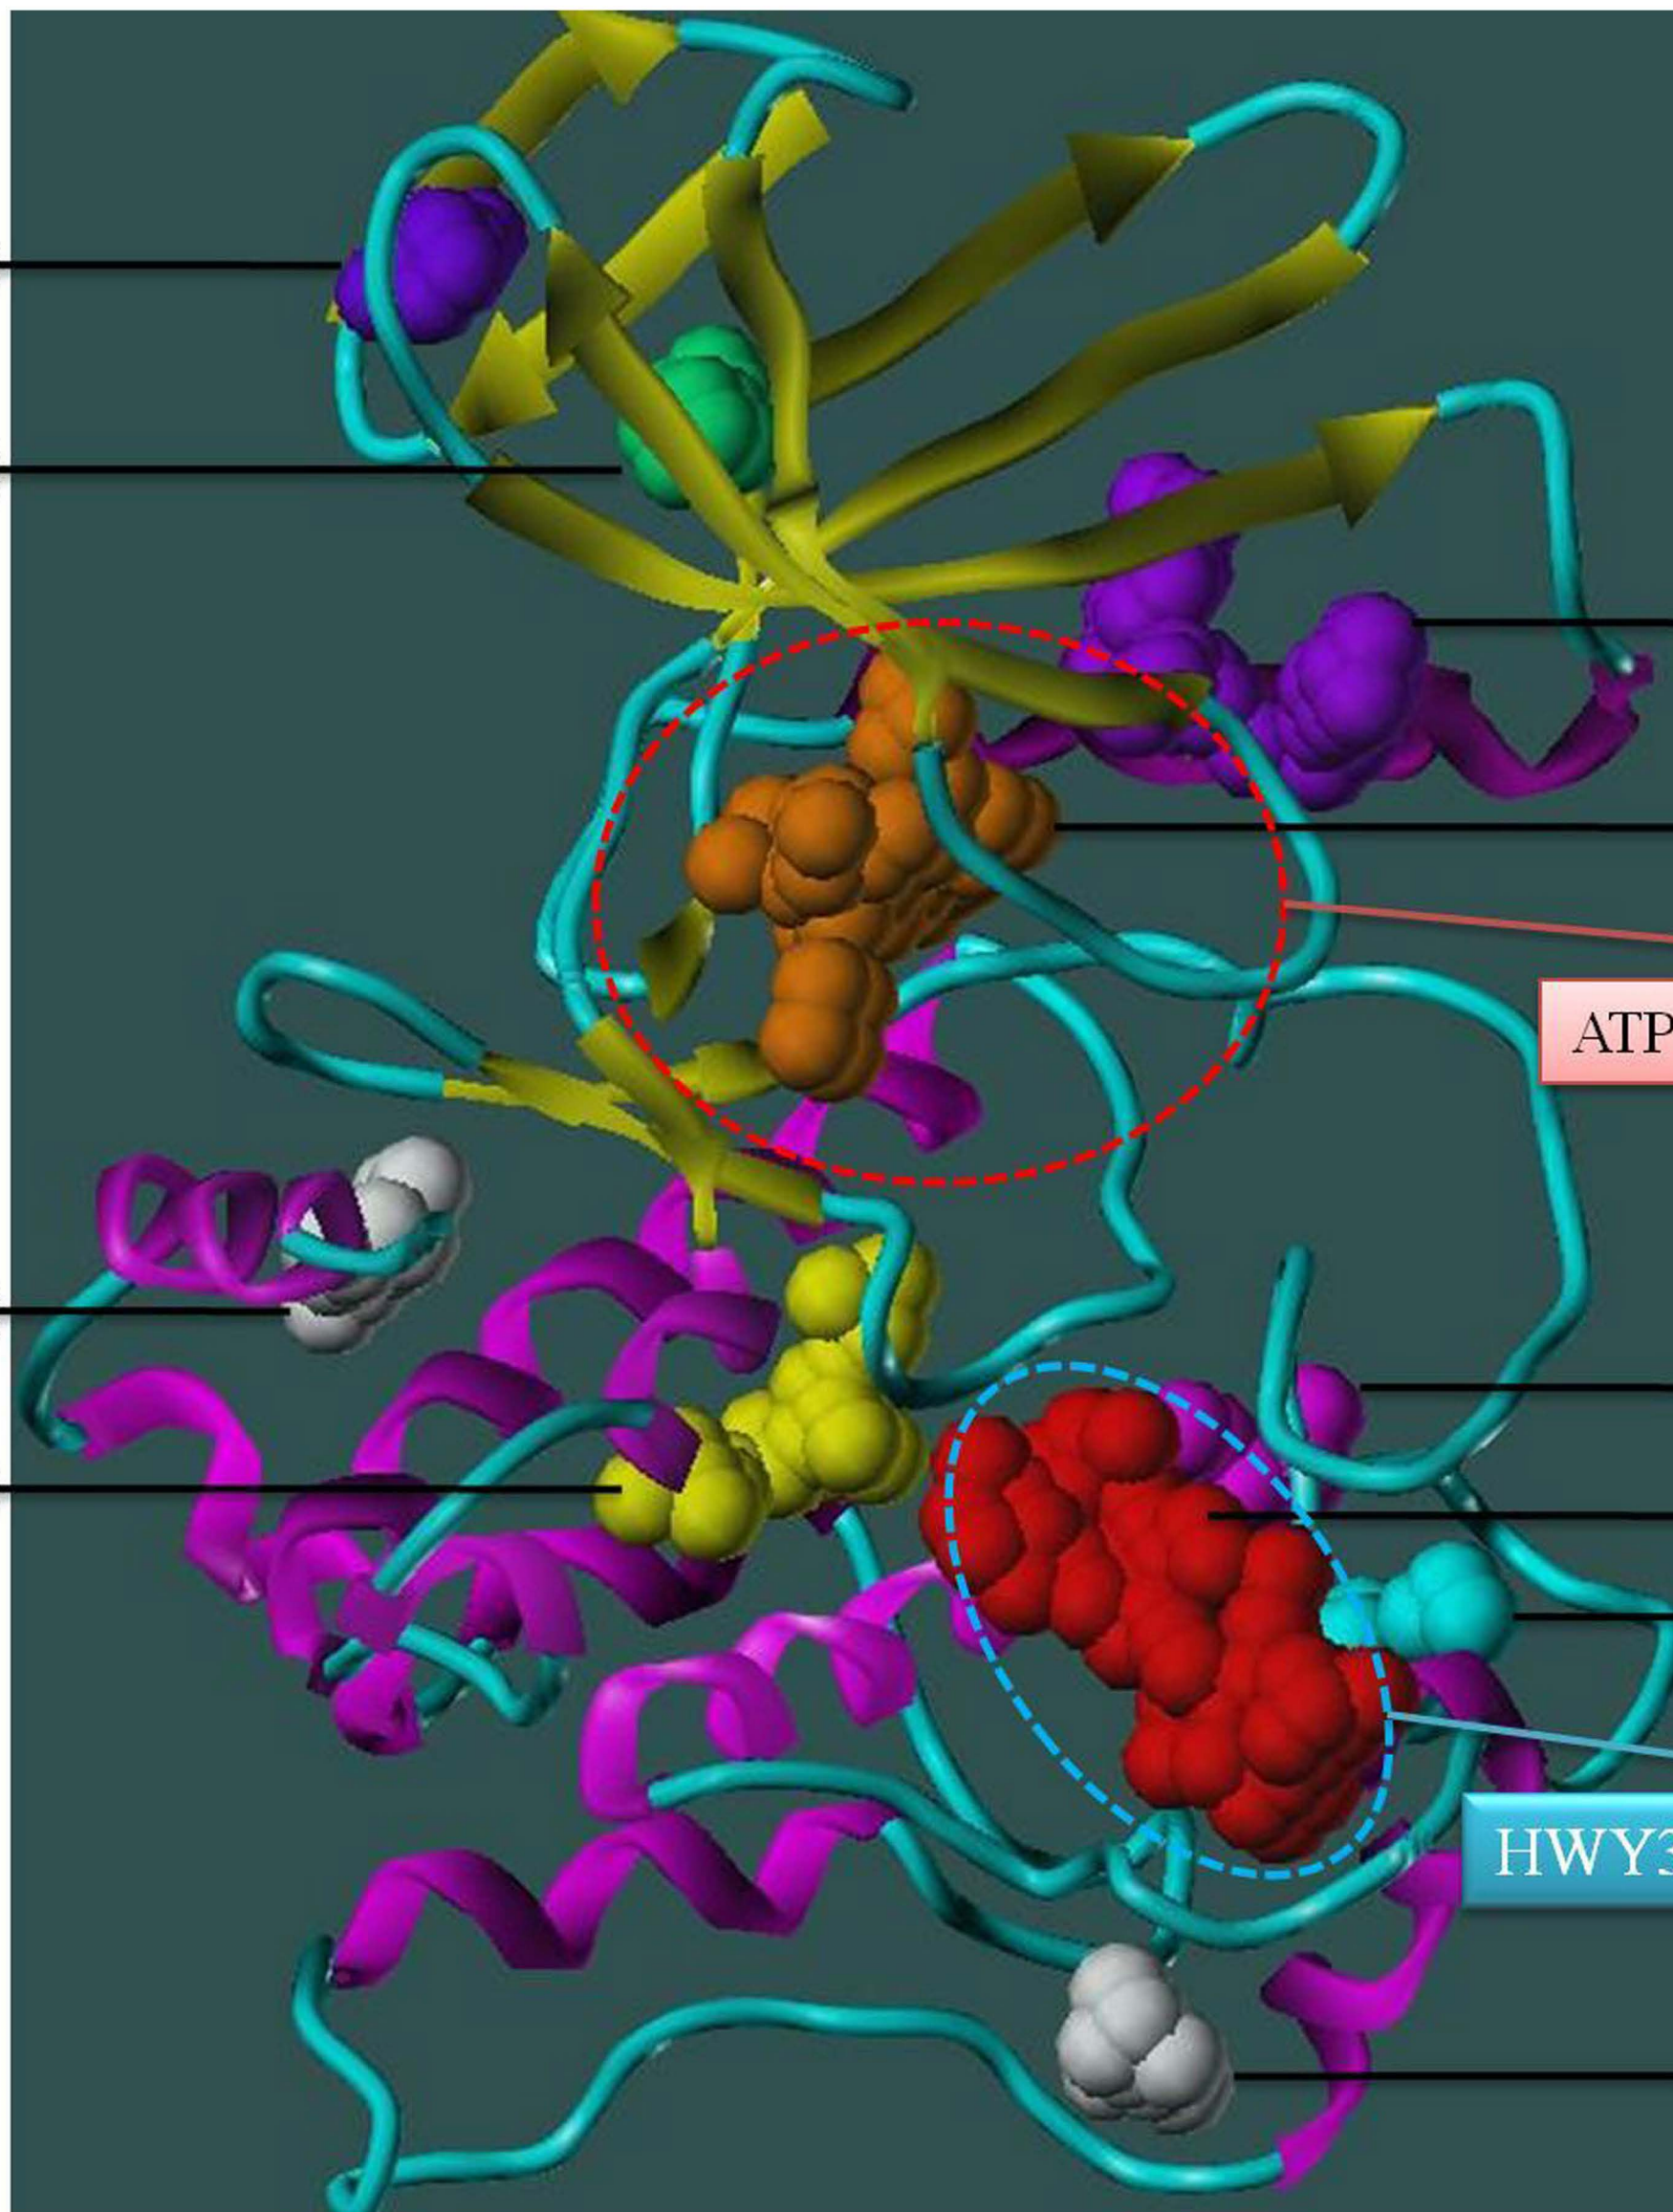

Supplement: pone.0091037.s001.pdf [file pone.0091037.s001.pdf]
